# Supplementary figures and images for: Patients’ Perspectives on the Impact of Genital Psoriasis: A Qualitative Study
Source: Springer Nature journal article supplement (doi:10.1007/s13555-017-0204-3), 2017-10-26

# Supplemental Fig 1. Draft Conceptual Disease Model Underlying Interview Development

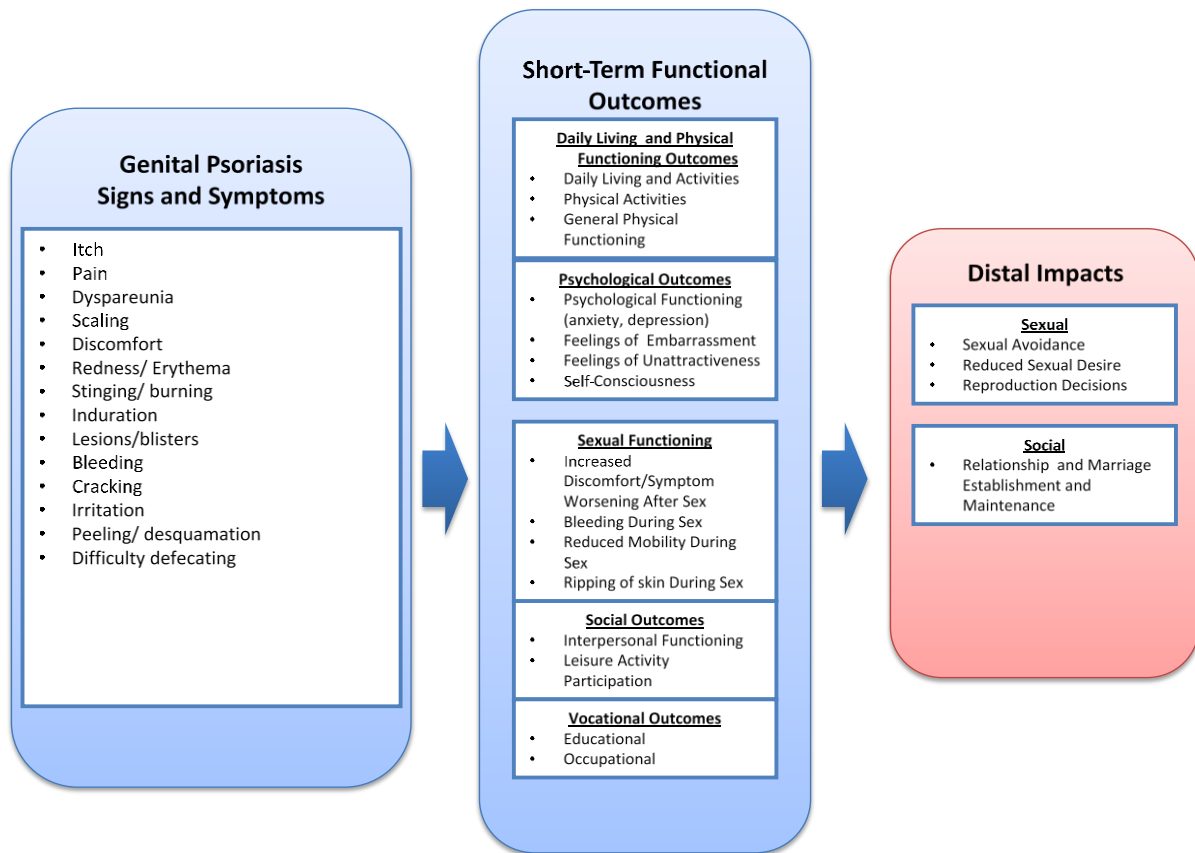

Supplement: MOESM1 [file 15167222]
